# Supplementary material
Source: PubMed Central journal article supplement (PMC3012457)
Supplement: 1017001108_pnas.201017001SI.pdf [file 1017001108_pnas.201017001SI.pdf]

# Supporting Information

Mizuno et al. 10.1073/pnas.1017001108

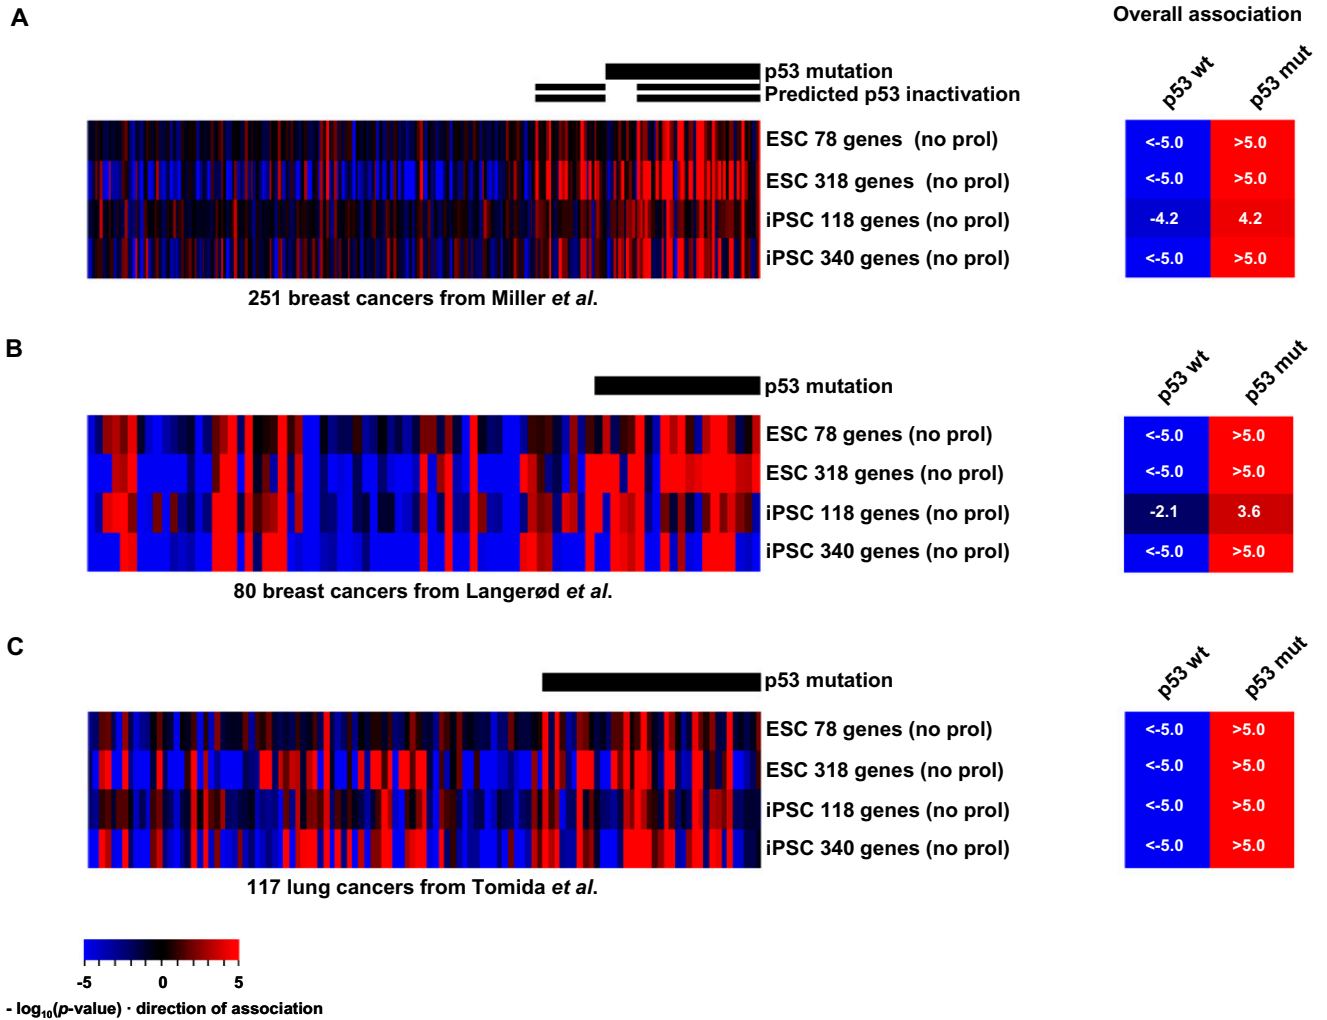

**Fig. S1.** Association scores from different sizes of ESC/iPSC signatures in (A) the Miller *et al.* (1) and (B) the Langerød *et al.* (2) datasets, and (C) Tomida *et al.* (3) datasets. Overall associations (*Right*) were assessed using representative profiles.

1. Miller LD, *et al.* (2005) An expression signature for p53 status in human breast cancer predicts mutation status, transcriptional effects, and patient survival. *Proc Natl Acad Sci USA* 102: 13550–13555.
2. Langerød A, *et al.* (2007) TP53 mutation status and gene expression profiles are powerful prognostic markers of breast cancer. *Breast Cancer Res* 9:R30.
3. Tomida S, *et al.* (2008) Relapse-related molecular signature in lung adeno carcinomas identify patients with dismal prognosis. *J Clin Oncol* 27:2793–2799.

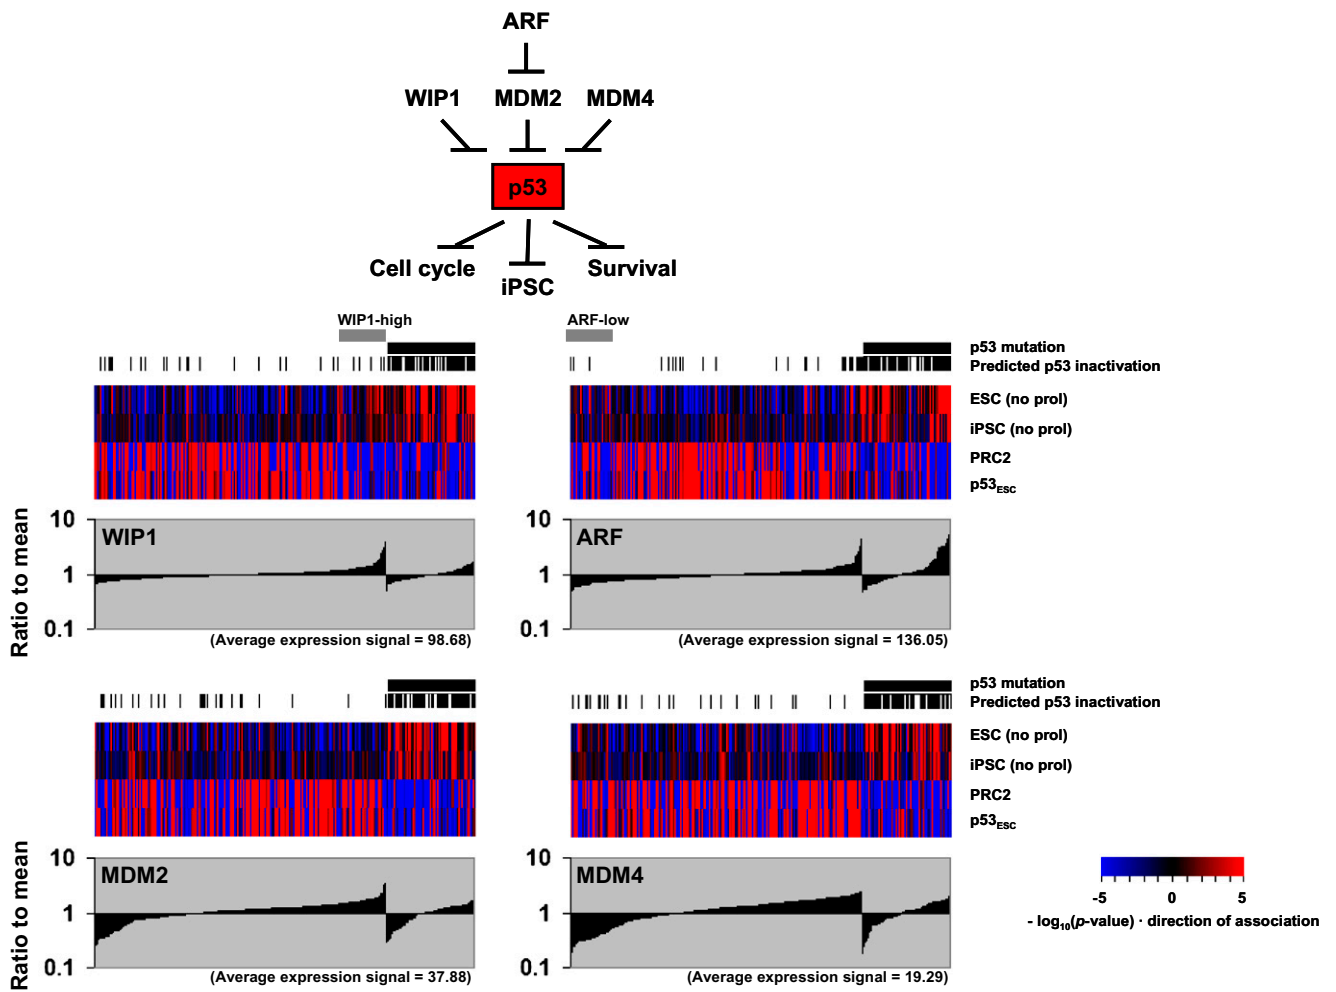

Fig. S2. *WIP1*, *ARF*, *MDM2*, and *MDM4* are known upstream regulators of p53 activity and are shown diagrammatically at the top. Tumors are sorted according to p53 mutation status and relative expression levels of these upstream p53 regulators. Association scores for ESC, iPSC, PRC2, and p53<sub>ESC</sub> signatures are shown. Gray areas over the p53 wild-type tumors in the *WIP1* and *ARF* plots show the demarcation of the highest and lowest 15% of expressers, respectively.

A

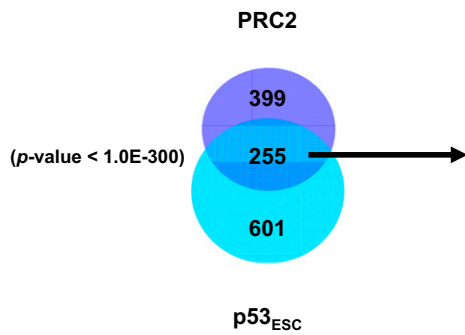

| Top 20 categories                                                                   | p-value  |
|-------------------------------------------------------------------------------------|----------|
| multicellular organismal development                                                | 6.37E-75 |
| system development                                                                  | 3.15E-74 |
| anatomical structure development                                                    | 5.31E-73 |
| developmental process                                                               | 3.05E-71 |
| organ development                                                                   | 6.31E-62 |
| multicellular organismal process                                                    | 1.58E-60 |
| anatomical structure morphogenesis                                                  | 2.42E-54 |
| cell differentiation                                                                | 2.78E-54 |
| nervous system development                                                          | 1.84E-52 |
| cellular developmental process                                                      | 3.03E-52 |
| regulation of transcription, DNA-dependent                                          | 1.48E-48 |
| regulation of RNA metabolic process                                                 | 1.71E-47 |
| regulation of nucleobase, nucleoside, nucleotide and nucleic acid metabolic process | 3.34E-42 |
| neurogenesis                                                                        | 4.35E-42 |
| regulation of biosynthetic process                                                  | 8.99E-42 |
| regulation of nitrogen compound metabolic process                                   | 9.79E-42 |
| regulation of cellular biosynthetic process                                         | 2.49E-41 |
| generation of neurons                                                               | 4.90E-40 |
| central nervous system development                                                  | 5.54E-40 |
| pattern specification process                                                       | 1.20E-39 |

B

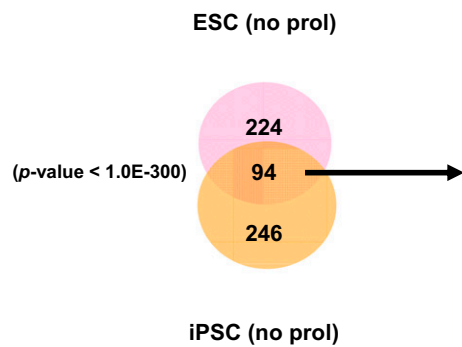

| Top 20 categories                                                                            | p-value  |
|----------------------------------------------------------------------------------------------|----------|
| DNA metabolic process                                                                        | 4.80E-05 |
| developmental process                                                                        | 7.16E-05 |
| organelle organization                                                                       | 9.64E-05 |
| multicellular organismal development                                                         | 1.63E-04 |
| multicellular organismal process                                                             | 3.84E-04 |
| DNA recombination                                                                            | 4.23E-04 |
| anatomical structure development                                                             | 5.91E-04 |
| cellular component organization                                                              | 0.00114  |
| cell development                                                                             | 0.00162  |
| system development                                                                           | 0.00208  |
| DNA-dependent DNA replication                                                                | 0.00512  |
| somatic recombination of immunoglobulin gene segments                                        | 0.00515  |
| chromatin silencing                                                                          | 0.00515  |
| cellular developmental process                                                               | 0.00545  |
| negative regulation of gene expression, epigenetic                                           | 0.00699  |
| female gamete generation                                                                     | 0.00704  |
| interspecies interaction between organisms                                                   | 0.00718  |
| somatic diversification of immunoglobulins                                                   | 0.00765  |
| cell differentiation                                                                         | 0.00788  |
| somatic diversification of immune receptors via germline recombination within a single locus | 0.00908  |

Fig. S3. Venn diagram for (A) p53<sub>ESC</sub> versus PRC2 signatures and for (B) ESC versus iPSC signatures. In each case, the overlap in genes is highly significant ( $\chi^2$  test). The top 20 gene-annotation categories identified among overlapping genes are listed at the right. These represent biological states and activities with likely functional relevance for samples that exhibit their coordinate up- or down-regulation.

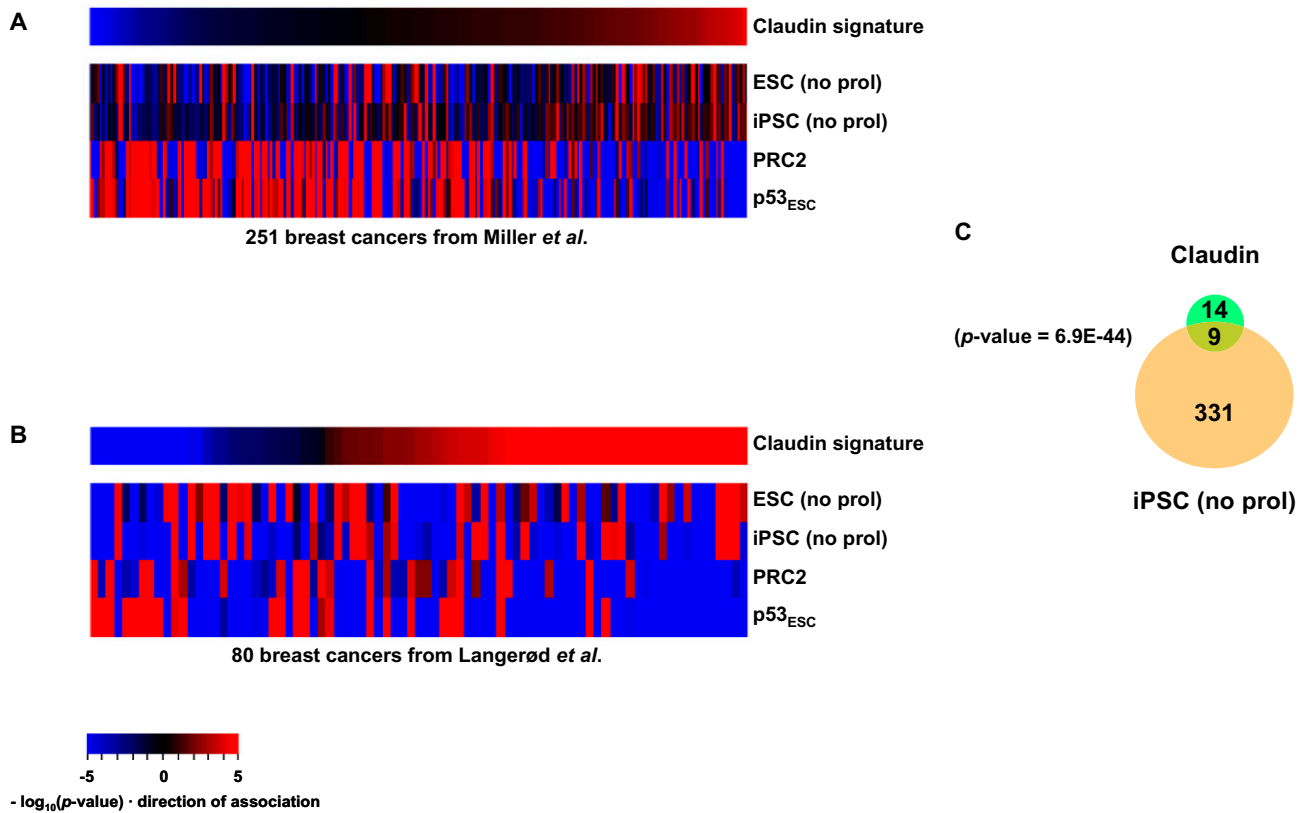

**Fig. S4.** Breast cancers were ordered according to association scores for the claudin signature (1) in (A) the Miller *et al.* (2) and (B) the Langerød *et al.* (3) datasets. Scores for ESC, iPSC, PRC2, and p53<sub>ESC</sub> signatures are also shown. (C) Venn diagram and overlap statistics ( $\chi^2$  test) for the claudin signature (1) versus the iPSC signature. The claudin signature used comprises the following genes: *APOE*, *BSRPY*, *CDH1*, *CGN*, *CLDN3*, *CLDN4*, *CLDN7*, *ELF3*, *EPCAM*, *EPN3*, *ESRP1*, *FXVD3*, *KRT19*, *MAL2*, *MB*, *MY06*, *NEBL*, *OCLN*, *PRR15L*, *SHROOM3*, *SPINT2*, *TOMIL1*, and *TRPS1* (1).

1. Hennesy BT, *et al.* (2009) Characterization of a naturally occurring breast cancer subset enriched in epithelial-to-mesenchymal transition and stem cell characteristics. *Cancer Res* 69: 4116–4124.
2. Miller LD, *et al.* (2005) An expression signature for p53 status in human breast cancer predicts mutation status, transcriptional effects, and patient survival. *Proc Natl Acad Sci USA* 102: 13550–13555.
3. Langerød A, *et al.* (2007) TP53 mutation status and gene expression profiles are powerful prognostic markers of breast cancer. *Breast Cancer Res* 9:R30.

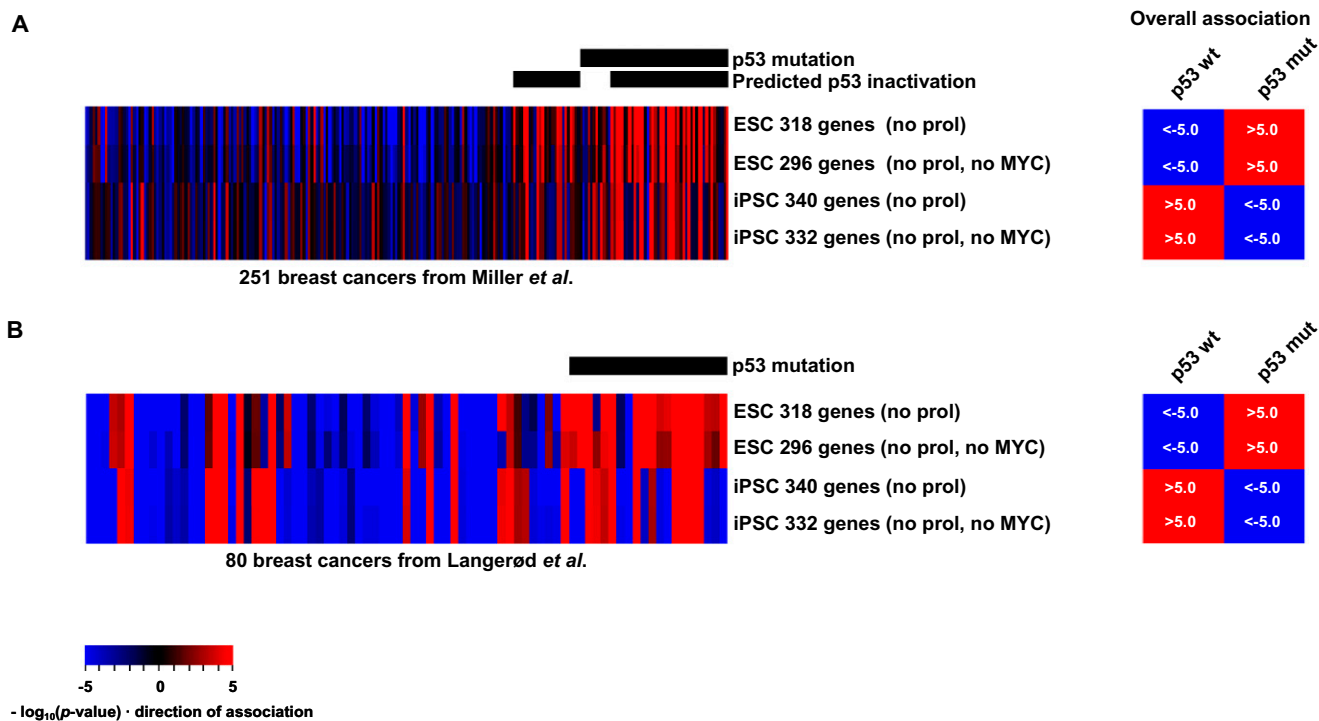

**Fig. S5.** Association scores from ESC/iPSC signatures after the removal of MYC-network genes (1) for (A) the Miller *et al.* (2) and (B) the Langerød *et al.* (3) datasets. Overall associations (*Right*) were assessed using representative profiles.

- Kim J, *et al.* (2010) A Myc network accounts for similarities between embryonic stem and cancer cell transcription programs. *Cell* 143:313–324.
- Miller LD, *et al.* (2005) An expression signature for p53 status in human breast cancer predicts mutation status, transcriptional effects, and patient survival. *Proc Natl Acad Sci USA* 102: 13550–13555.
- Langerød A, *et al.* (2007) TP53 mutation status and gene expression profiles are powerful prognostic markers of breast cancer. *Breast Cancer Res* 9:R30.

**Table S1. Datasets used for iPSC signature generation**

[Table S1](#)

**Table S2. Genes up-regulated in various iPSCs**

[Table S2](#)
